# Supplementary material for: Strategies for feeding the world more sustainably with organic agriculture
Source: PubMed Central journal article supplement (PMC5686079; doi:10.1038/s41467-017-01410-w), 2017-11-14
Supplement: 41467_2017_1410_MOESM2_ESM.pdf [file 41467_2017_1410_MOESM2_ESM.pdf]

**Supplementary Table 1: Comparison of aggregate N quantity categories for SOLm and Tubiello 2013<sup>68</sup>**

| N (megatons)                                                                | SOLm | Tubiello 2013 <sup>68</sup> |
|-----------------------------------------------------------------------------|------|-----------------------------|
| N in manure (total in all manure management systems incl. left on pastures) | 115  | 113                         |
| N in manure applied to croplands                                            | 20   | 25                          |
| N in manure applied to grasslands                                           | 48   | 40*                         |
| N from mineral fertilizers                                                  | 98   | 100                         |
| N in total crop residues                                                    | 34   | 30                          |
| N fixation in crops (without rice and sugar cane)                           | 25   | 22**                        |

\*equals the total N quantity in manure left on pastures minus the N volatilized and leached from N in manure left on pastures

\*\*the source for this number is not Tubiello (2013)<sup>68</sup> but Herridge et al. (2008)<sup>47</sup>.

**Supplementary Table 2: Comparison of aggregate GHG emission categories for SOLm, Tubiello 2013 and Gerber et al. 2013<sup>68,69</sup>**

| GHG emissions (gigatons)                                | SOLm | Tubiello 2013 <sup>68</sup> | Gerber et al. 2013 <sup>69</sup> |
|---------------------------------------------------------|------|-----------------------------|----------------------------------|
| Methane from rice production                            | 0.49 | 0.5                         |                                  |
| Enteric fermentation                                    | 2.32 | 2.02                        | 2.78                             |
| Manure management CH <sub>4</sub>                       | 0.31 | 0.22                        | 0.31                             |
| Manure management N <sub>2</sub> O total                | 0.31 | 0.12                        | 0.37                             |
| Manure management N <sub>2</sub> O direct               | 0.11 | 0.11                        |                                  |
| Manure management N <sub>2</sub> O indirect             | 0.2  | 0.01                        |                                  |
| Synthetic fertilizer application (direct plus indirect) | 0.58 | 0.65                        |                                  |
| Crop residues application                               | 0.16 | 0.18                        |                                  |
| Manure application (on crops and grass)                 | 0.82 | 0.97                        | 1.16                             |

**Supplementary Table 3: Pesticide model classifications**

---

**Rating Pesticide level per crop (PUI)**

---

- 0 No harmful pesticides\* used
  - 1 Low level of pesticide application
  - 2 Medium level of pesticide application
  - 3 High level of pesticide application / harmful pesticides used\*
- 

\* WHO classification

---

**Rating Pesticide legislation per country (PL)**

---

- 0 All chem.-synthetic pesticides (WHO-classes 1-2) banned
  - 1 Rigid pesticide legislation and control excludes harmful pesticides\*
  - 2 Average pesticide legislation and control
  - 3 Legislation does not preclude the use of harmful pesticides\*
- 

\*WHO classification

---

**Rating Access to pesticides per country (AP)**

---

- 0 Farmers have no access to chem.-synthetic (WHO-classes 1-2) pesticides
  - 1 Only few farmers have access to chem.-synthetic pesticides (max. 10% of the cultivated land is treated with pesticides)
  - 2 Some farmers have access to chem.-synthetic pesticides (10-50% of the land that deserves treatment is treated)
  - 3 Many farmers have access to chem.-synthetic pesticides (min. 50% of the land that deserves treatment is treated)
-

**Supplementary Table 4: Country-specific ratings of pesticide legislation (PL) and the accessibility of pesticides to farmers (AP)**

| Country                | PL  | AP  | Country                | PL  | AP  | Country               | PL  | AP  | Country              | PL  | AP  |
|------------------------|-----|-----|------------------------|-----|-----|-----------------------|-----|-----|----------------------|-----|-----|
| Afghanistan            | 3   | 1   | Ecuador                | 2.5 | 2.5 | Maldives              | 2   | 2   | Saudi Arabia         | 2   | 3   |
| Albania                | 2.5 | 2.5 | Egypt                  | 2   | 3   | Mali                  | 2.5 | 1   | Senegal              | 2   | 1   |
| Algeria                | 2   | 2   | El Salvador            | 2   | 3   | Malta                 | 1.5 | 3   | Serbia               | 2   | 3   |
| American Samoa         | 2   | 3   | Equatorial Guinea      | 3   | 2   | Marshall Islands      |     |     | Serbia and           |     |     |
| Andorra                | 2   | 3   | Eritrea                | 2.5 | 1   | Martinique            | 2   | 3   | Montenegro           | 2   | 3   |
| Angola                 | 3   | 1   | Estonia                | 1.5 | 3   | Mauritania            | 2.5 | 1   | Seychelles           | 3   | 2   |
| Anguilla               | 2   | 3   | Ethiopia               | 2   | 1.5 | Mauritius             | 2   | 2   | Sierra Leone         | 3   | 1   |
| Antigua and Barbuda    | 2   | 3   | Falkland Islands       |     |     | Mayotte               | 3   | 1   | Singapore            | 2.5 | 2.5 |
| Argentina              | 2   | 2.5 | (Malvinas)             | 2   | 3   | Mexico                | 2   | 2.5 | Slovakia             | 2   | 3   |
| Armenia                | 3   | 3   | Faroe Islands          | 1   | 3   | Micronesia            |     |     | Slovenia             | 2   | 3   |
| Aruba                  | 2   | 3   | Fiji                   | 2   | 3   | (Federated States of) | 2   | 3   | Solomon Islands      | 2   | 3   |
| Australia              | 1   | 3   | Finland                | 1   | 3   | Mongolia              | 3   | 1   | Somalia              | 3   | 1   |
| Austria                | 1   | 3   | France                 | 1   | 3   | Montenegro            | 2   | 3   | South Africa         | 2   | 2   |
| Azerbaijan             | 3   | 2   | French Guiana          | 2   | 2   | Montserrat            | 2   | 3   | Spain                | 1.5 | 3   |
| Bahamas                | 2   | 3   | French Polynesia       | 1.5 | 3   | Morocco               | 1   | 2   | Sri Lanka            | 2.5 | 1   |
| Bahrain                | 2   | 2.5 | Gabon                  | 3   | 1.5 | Mozambique            | 2   | 2   | Sudan                | 3   | 1   |
| Bangladesh             | 3   | 1   | Gambia                 | 2.5 | 1   | Myanmar               | 3   | 1   | Suriname             | 2.5 | 2   |
| Barbados               | 2   | 3   | Georgia                | 3   | 2   | Namibia               | 2   | 2   | Swaziland            | 3   | 2   |
| Belarus                | 2.5 | 3   | Germany                | 1   | 3   | Nauru                 | 2   | 3   | Sweden               | 1   | 3   |
| Belgium                | 1   | 3   | Ghana                  | 2   | 1.5 | Nepal                 | 3   | 1   | Switzerland          | 1   | 3   |
| Belize                 | 2   | 3   | Gibraltar              | 2   | 3   | Netherlands           | 1   | 3   | Syrian Arab Republic | 2   | 2   |
| Benin                  | 2.5 | 1   | Greece                 | 2   | 3   | Netherlands Antilles  | 2   | 3   | Tajikistan           | 3   | 2   |
| Bermuda                | 2   | 3   | Greenland              | 1   | 2.5 | New Caledonia         | 1.5 | 3   | Thailand             | 2.5 | 1   |
| Bhutan                 | 3   | 1.5 | Grenada                | 2   | 3   | New Zealand           | 1   | 3   | The former Yugoslav  |     |     |
| Bolivia (Plurinational |     |     | Guadeloupe             | 2   | 2.5 | Nicaragua             | 2   | 2.5 | Republic of          |     |     |
| State of)              | 3   | 2   | Guam                   | 2   | 3   | Niger                 | 2.5 | 1   | Macedonia            | 2   | 3   |
| Bosnia and             |     |     | Guatemala              | 2   | 3   | Nigeria               | 3   | 1   | Timor-Leste          | 3   | 1   |
| Herzegovina            | 2   | 3   | Guinea                 | 2.5 | 1   | Niue                  | 2   | 2.5 | Togo                 | 2.5 | 1   |
| Botswana               | 2   | 1.5 | Guinea-Bissau          | 3   | 1   | Norfolk Island        |     |     | Tokelau              | 2   | 2.5 |
| Brazil                 | 1.5 | 2.5 | Guyana                 | 2.5 | 2   | Northern Mariana      |     |     | Tonga                | 2   | 3   |
| British Virgin Islands | 2   | 3   | Haiti                  | 3   | 2   | Islands               |     |     | Trinidad and Tobago  | 2   | 3   |
| Brunei Darussalam      | 2   | 2   | Honduras               | 2   | 3   | Norway                | 1   | 3   | Tunisia              | 2   | 2   |
| Bulgaria               | 2.5 | 3   | Hungary                | 2   | 3   | Occupied Palestinian  |     |     | Turkey               | 2   | 2   |
| Burkina Faso           | 2.5 | 1   | Iceland                | 1   | 3   | Territory             | 3   | 1   | Turkmenistan         | 3   | 2.5 |
| Burundi                | 2   | 2   | India                  | 3   | 1.5 | Oman                  | 2   | 3   | Turks and Caicos     |     |     |
| Cambodia               | 3   | 1   | Indonesia              | 3   | 1   | Pakistan              | 3   | 1   | Islands              | 2   | 3   |
| Cameroon               | 3   | 2   | Iran (Islamic Republic |     |     | Palau                 |     |     | Tuvalu               | 2   | 2.5 |
| Canada                 | 1   | 3   | of)                    | 3   | 2   | Panama                | 2   | 3   | Uganda               | 2   | 2   |
| Cape Verde             | 3   | 1.5 | Iraq                   | 2   | 2   | Papua New Guinea      | 2.5 | 1.5 | Ukraine              | 2.5 | 3   |
| Cayman Islands         | 2   | 3   | Ireland                | 1   | 3   | Paraguay              | 2   | 3   | United Arab Emirates | 2   | 3   |
| Central African        |     |     | Isle of Man            | 1   | 3   | Peru                  | 2.5 | 2   | United Kingdom       | 1   | 3   |
| Republic               | 3   | 1   | Israel                 | 2   | 3   | Philippines           | 2.5 | 1.5 | United Republic of   |     |     |
| Chad                   | 3   | 1   | Italy                  | 1.5 | 3   | Pitcairn Islands      |     |     | Tanzania             | 2   | 2   |
| Channel Islands        | 1   | 3   | Jamaica                | 2   | 2.5 | Poland                | 2   | 3   | United States of     |     |     |
| Chile                  | 2   | 3   | Japan                  | 1   | 3   | Portugal              | 1   | 3   | America              | 1   | 3   |
| China                  | 3   | 2   | Jordan                 | 2   | 3   | Puerto Rico           | 2   | 2   | United States Virgin |     |     |
| Colombia               | 2   | 2.5 | Kazakhstan             | 3   | 2   | Qatar                 | 2   | 3   | Islands              | 1.5 | 3   |
| Comoros                | 2   | 2   | Kenya                  | 2   | 2   | Republic of Korea     | 1.5 | 3   | Uruguay              | 2   | 3   |
| Congo                  | 3   | 1   | Kiribati               | 2   | 3   | Republic of Moldova   | 3   | 2.5 | Uzbekistan           | 3   | 2   |
| Cook Islands           | 1.5 | 3   | Kuwait                 | 2   | 3   | Réunion               | 3   | 2   | Vanuatu              | 2   | 3   |
| Costa Rica             | 2   | 3   | Kyrgyzstan             | 3   | 2   | Romania               | 2   | 3   | Venezuela            |     |     |
| Côte d'Ivoire          | 3   | 1   | Lao People's           |     |     | Russian Federation    | 3   | 2   | (Bolivarian Republic |     |     |
| Croatia                | 1.5 | 3   | Democratic Republic    | 3   | 1   | Rwanda                | 2   | 2   | of)                  | 2   | 2.5 |
| Cuba                   | 2.5 | 2   | Latvia                 | 1.5 | 3   | Saint Helena          | 3   | 1   | Viet Nam             | 3   | 1   |
| Cyprus                 | 2   | 3   | Lebanon                | 2   | 2   | Saint Kitts and Nevis | 2   | 3   | Wallis and Futuna    |     |     |
| Czech Republic         | 2   | 3   | Lesotho                | 2   | 2   | Saint Lucia           | 2   | 3   | Islands              | 2   | 3   |
| Democratic People's    |     |     | Liberia                | 3   | 1   | Saint Pierre and      |     |     | Western Sahara       | 2   | 1   |
| Republic of Korea      | 3   | 1.5 | Libya                  | 2   | 2   | Miquelon              | 1   | 3   | Yemen                | 2   | 2   |
| Democratic Republic    |     |     | Liechtenstein          | 2   | 3   | Saint Vincent and the |     |     | Yugoslav SFR         | 2   | 3   |
| of the Congo           | 3   | 1   | Lithuania              | 1.5 | 3   | Grenadines            | 2   | 3   | Zambia               | 3   | 1.5 |
| Denmark                | 1   | 3   | Luxembourg             | 1   | 3   | Samoa                 | 2   | 3   | Zimbabwe             | 3   | 1   |
| Djibouti               | 3   | 2   | Madagascar             | 2   | 2   | San Marino            | 2   | 3   |                      |     |     |
| Dominica               | 2   | 2.5 | Malawi                 | 2   | 2   | Sao Tome and          |     |     |                      |     |     |
| Dominican Republic     | 2   | 2.5 | Malaysia               | 2   | 1.5 | Principe              | 3   | 2   |                      |     |     |

PL = Pesticide legislation; AP = accessibility of pesticides to farmers

**Supplementary Table 5: Crop-specific pesticide use intensity (PUI)**

| Activity                       | PUI | Activity                        | PUI | Activity                       | PUI |
|--------------------------------|-----|---------------------------------|-----|--------------------------------|-----|
| Agave Fibres Nes               | 1   | Ginger                          | 2   | Pigeon peas                    | 2   |
| Alfalfa For Forage+Silag       | 0   | Gooseberries                    | 3   | Pineapples                     | 2.5 |
| Alfalfa Meal And Pellets       | 0   | Grapefruit (inc. pomelos)       | 3   | Pistachios                     | 1   |
| Almonds, with shell            | 2   | Grapes                          | 3   | Plantains                      | 3   |
| Anise, badian, fennel, corian. | 1   | Grass                           | 0   | Plums and sloes                | 3   |
| Apples                         | 3   | Grasses Nes,Forage+Silag        | 0   | Pome Fruit Nes                 | 3   |
| Apricots                       | 3   | Groundnuts, with shell          | 2   | Popcorn                        | 2.5 |
| Arabic Gum                     | 0   | Gums Natural                    | 3   | Poppy seed                     | 1   |
| Arecanuts                      | 1   | Hay (Clover, Lucerne, Etc)      | 0   | Potatoes                       | 3   |
| Artichokes                     | 2.5 | Hay (Unspecified)               | 0   | Pulses, nes                    | 2   |
| Asparagus                      | 2.5 | Hay Non-Leguminous              | 0   | Pumpkins, squash and gourds    | 3   |
| Avocados                       | 3   | Hazelnuts, with shell           | 1   | Pyrethrum, Dried               | 0   |
| Bambara beans                  | 2   | Hemp Tow Waste                  | 2   | Quinces                        | 3   |
| Bananas                        | 3   | Hempseed                        | 1   | Quinoa                         | 1   |
| Barley                         | 2   | Hops                            | 2   | Ramie                          | 1   |
| Beans, dry                     | 3   | Jajoba                          | 0   | Rapeseed                       | 3   |
| Beans, green                   | 2   | Jute                            | 2   | Raspberries                    | 3   |
| Beets For Fodder               | 0   | Kapok Fruit                     | 2   | Rice, paddy                    | 3   |
| Berries Nes                    | 2   | Karite Nuts (Sheanuts)          | 1   | Roots and Tubers, most         | 0   |
| Blueberries                    | 2   | Kiwi fruit                      | 3   | Roots and Tubers, nes          | 2.5 |
| Brazil nuts, with shell        | 1   | Kolanuts                        | 1   | Rye                            | 1   |
| Broad beans, horse beans, dry  | 3   | Leguminous Nes, For+Sil         | 0   | Safflower seed                 | 2   |
| Buckwheat                      | 1   | Leguminous vegetables, nes      | 2.5 | Seed cotton                    | 3   |
| Cabbages and other brassicas   | 3   | Lemons and limes                | 3   | Sesame seed                    | 2   |
| Canary seed                    | 1   | Lentils                         | 1   | Sisal                          | 2   |
| Carobs                         | 2   | Lettuce and chicory             | 2.5 | Sorghum                        | 2.5 |
| Carrots and turnips            | 3   | Linseed                         | 1   | Sour cherries                  | 3   |
| Cashew nuts, with shell        | 1.5 | Lupins                          | 1   | Soybeans                       | 3   |
| Cashewapple                    | 2   | Maize                           | 3   | Spices, nes                    | 2   |
| Cassava                        | 2.5 | Maize For Forage+Silage         | 0   | Spinach                        | 3   |
| Castor oil seed                | 3   | Maize, green                    | 3   | Starch and Sugar crops for Alc | 0   |
| Cauliflowers and broccoli      | 3   | Mangoes, mangosteens, guavas    | 3   | Stone fruit, nes               | 3   |
| Cereals, most                  | 0   | Manila Fibre (Abaca)            | 2   | Straw, Husks                   | 0   |
| Cereals, nes                   | 2   | Maple                           | 0   | Strawberries                   | 3   |
| Cherries                       | 3   | Maté                            | 2   | String beans                   | 3   |
| Chestnuts                      | 1.5 | Melonseed                       | 1   | Sugar beet                     | 2.5 |
| Chick peas                     | 3   | Millet                          | 2.5 | Sugar cane                     | 3   |
| Chicory roots                  | 2.5 | Mixed grain                     | 2   | Sugar crops, nes               | 2.5 |
| Chillies and peppers, dry      | 2.5 | Mules                           | 0   | Sunflower seed                 | 1   |
| Chillies and peppers, green    | 2.5 | Mushrooms and truffles          | 0   | Swedes For Fodder              | 0   |
| Cinnamon (canella)             | 2   | Mustard seed                    | 1   | Sweet potatoes                 | 2.5 |
| Citrus fruit, nes              | 3   | Natural rubber                  | 3   | Tallow tree                    | 0   |
| Clover For Forage+Silage       | 0   | Nutmeg, mace and cardamoms      | 2   | Tangerines, mandarins, clem.   | 3   |
| Cloves                         | 3   | Nuts, nes                       | 1.5 | Taro (cocoyam)                 | 2.5 |
| Cocoa beans                    | 3   | Oats                            | 1   | Tea                            | 3   |
| Coconuts                       | 2.5 | Oil Of Citronella               | 0   | Tea Nes                        | 0   |
| Coffee, green                  | 3   | Oil palm fruit                  | 3   | Tobacco, unmanufactured        | 3   |
| Coir                           | 2   | Oils Marine Animals             | 0   | Tomatoes                       | 3   |
| Cow peas, dry                  | 3   | Oilseeds, Nes                   | 2.5 | Triticale                      | 2   |
| Cranberries                    | 1   | Okra                            | 2   | Tung Nuts                      | 1   |
| Cucumbers and gherkins         | 3   | Olives                          | 2   | Turkeys                        | 0   |
| Currants                       | 2   | Onions (inc. shallots), green   | 2   | Turnips For Fodder             | 0   |
| Dates                          | 3   | Onions, dry                     | 2   | Vanilla                        | 2   |
| Eggplants (aubergines)         | 3   | Oranges                         | 3   | Vegetables fresh nes           | 2.5 |
| Eggs Excl Hen                  | 0   | Other Bastfibres                | 2   | Vegetables, most               | 0   |
| Fibre Crops Nes                | 3   | Other melons (inc. cantaloupes) | 2.5 | Vegetables+Roots, Fodder       | 0   |
| Figs                           | 2   | Papayas                         | 3   | Vetches                        | 1   |
| Flax fibre and tow             | 2   | Peaches and nectarines          | 3   | Walnuts, with shell            | 1.5 |
| Fonio                          | 1   | Pears                           | 3   | Watermelons                    | 3   |
| Forage Products Nes            | 0   | Peas, dry                       | 3   | Wheat                          | 2   |
| Fruit Fresh Nes                | 3   | Peas, green                     | 3   | Yams                           | 2.5 |
| Fruit, tropical fresh nes      | 3   | Pepper (Piper spp.)             | 2   | Yautia (cocoyam)               | 2.5 |
| Fruits, most                   | 0   | Peppermint                      | 1   |                                |     |
| Garlic                         | 1.5 | Persimmons                      | 2   |                                |     |

PUI = Pesticide use intensity; Nes = other, not elsewhere specified

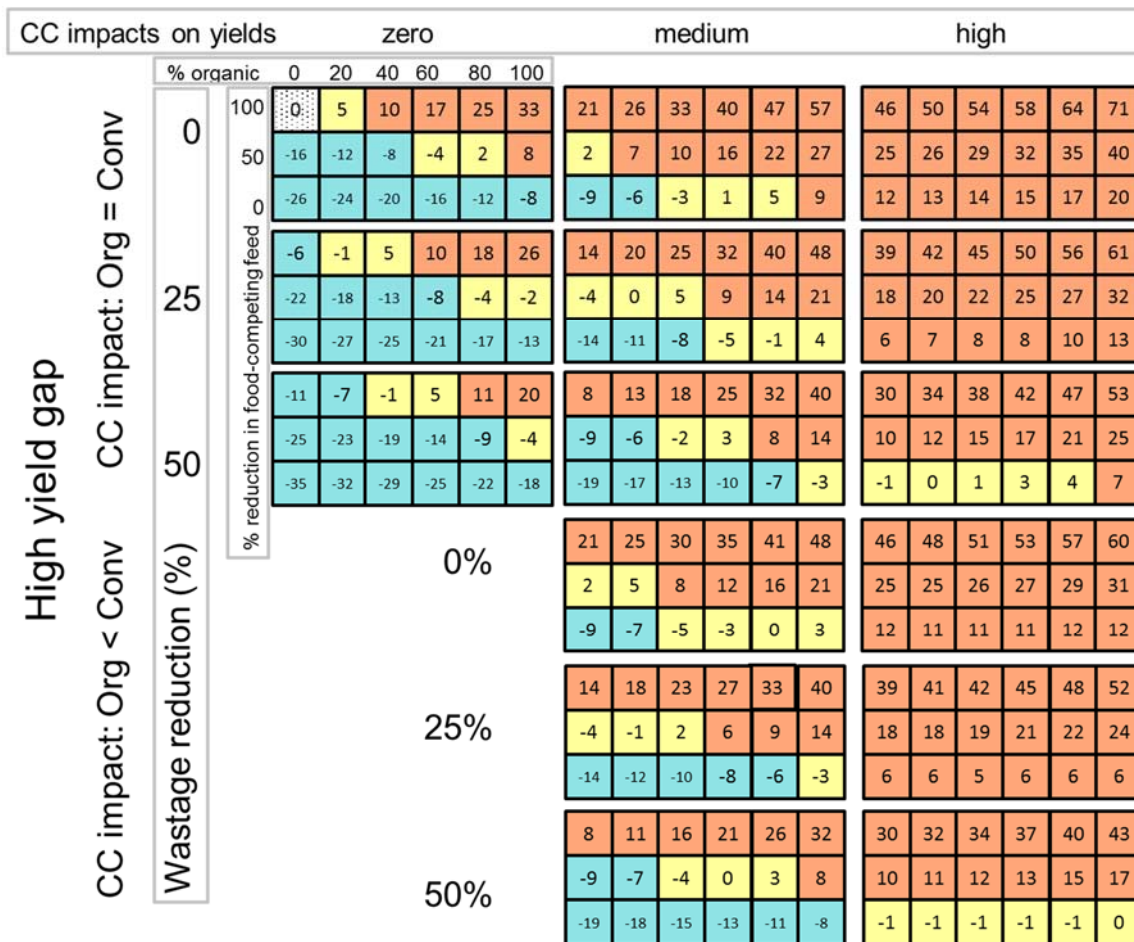

**Supplementary Figure 1: Cropland area change with high yield gaps assumed**

Percentage change in cropland areas with respect to the reference scenario (0% organic agriculture, no changes in livestock feed and food waste). Calories are kept constant for all scenarios. High yield gaps<sup>10</sup>; scenarios differ in organic shares (0-100%); impacts of climate change on yields (low, medium, high; lower impacts for organic than conventional agriculture); food-competing feed reductions (0, 50, 100% reduced from the levels in the reference scenario) and wastage reduction (0, 25, 50% with respect to the reference scenario). Colour code for the relation to reference scenario value that is displayed in dotted grey: >+5%: red, <-5% blue, between -5% and +5% yellow; in the reference scenario, cropland areas are 6% higher than in the baseline today.

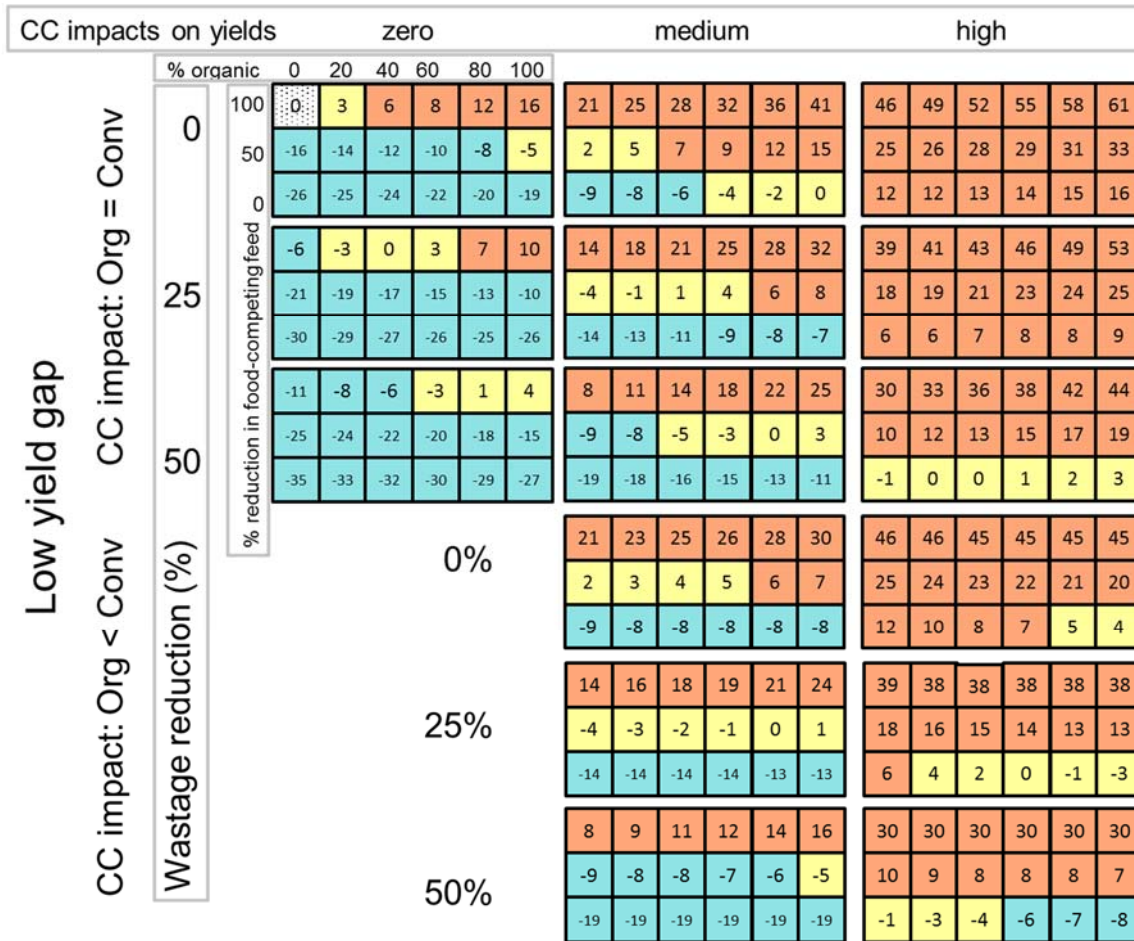

**Supplementary Figure 2: Cropland area change with low yield gaps assumed**

Percentage change in cropland areas with respect to the reference scenario (0% organic agriculture, no changes in livestock feed and food waste). Calories are kept constant for all scenarios. Low yield gaps<sup>9</sup>; scenarios differ in organic shares (0-100%); impacts of climate change on yields (low, medium, high; lower impacts for organic than conventional agriculture); food-competing feed reductions (0, 50, 100% reduced from the levels in the reference scenario) and wastage reduction (0, 25, 50% with respect to the reference scenario). Colour code for the relation to reference scenario value that is displayed in dotted grey: >+5%: red, <-5% blue, between -5% and +5% yellow; in the reference scenario, cropland areas are 6% higher than in the baseline today.

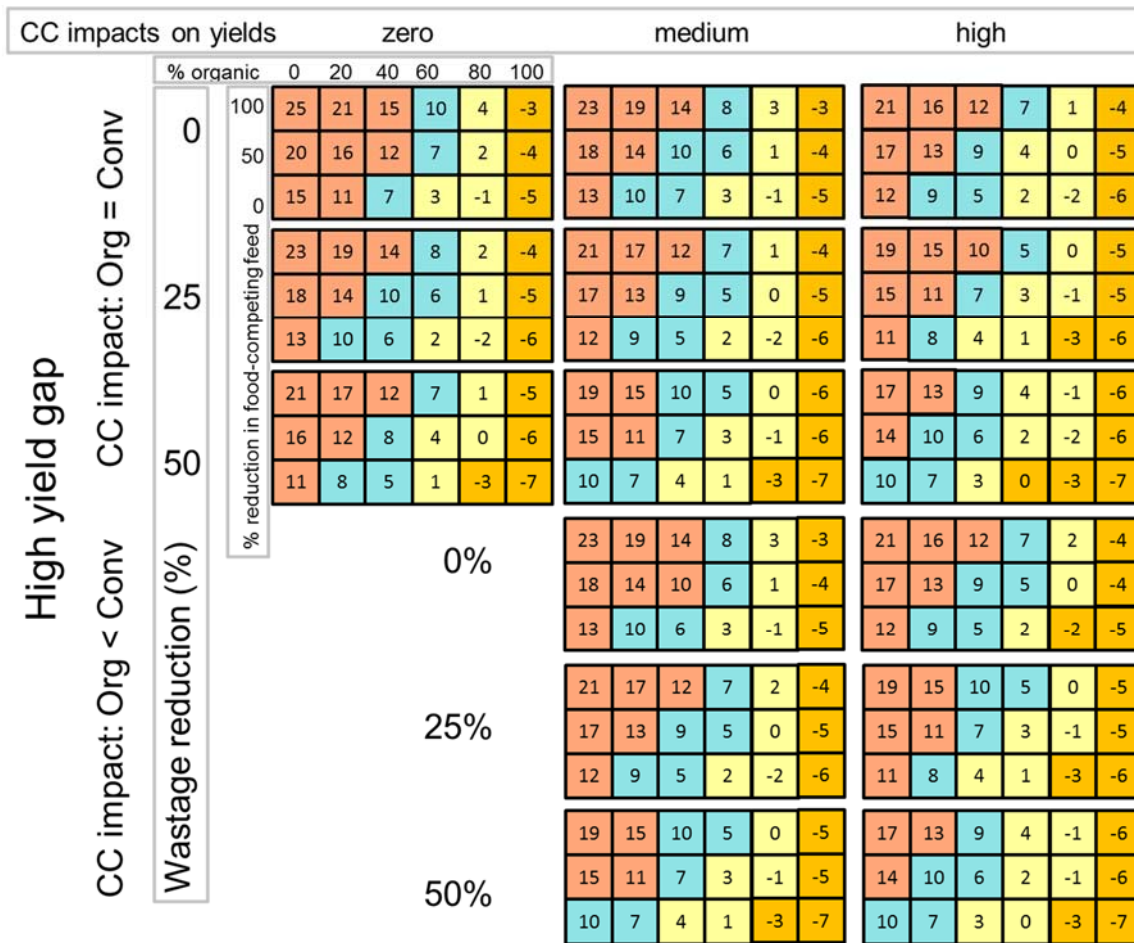

**Supplementary Figure 3: Nitrogen balance with high yield gaps assumed**

N-surplus (positive values) or deficit (negative values) in kg N/ha. Calories are kept constant for all scenarios. High yield gaps<sup>10</sup>; scenarios differ in organic shares (0-100%); climate change impacts (low, medium, high; lower impacts for organic than conventional agriculture); food-competing feed reductions (0, 50, 100% reduced from the levels in the reference scenario) and wastage reduction (0, 25, 50% with respect to the reference scenario). Colour code for the relation to reference scenario values (0% organic agriculture, no changes in livestock feed and food waste): >10kg/ha: red (unsustainably high), between 10kg/ha and 5kg/ha blue (optimum, reduction from current average surplus by 60-80%<sup>31,32</sup>), between 4kg/ha and -2kg/ha yellow (critical, rather low), <-2kg/ha red (deficit).

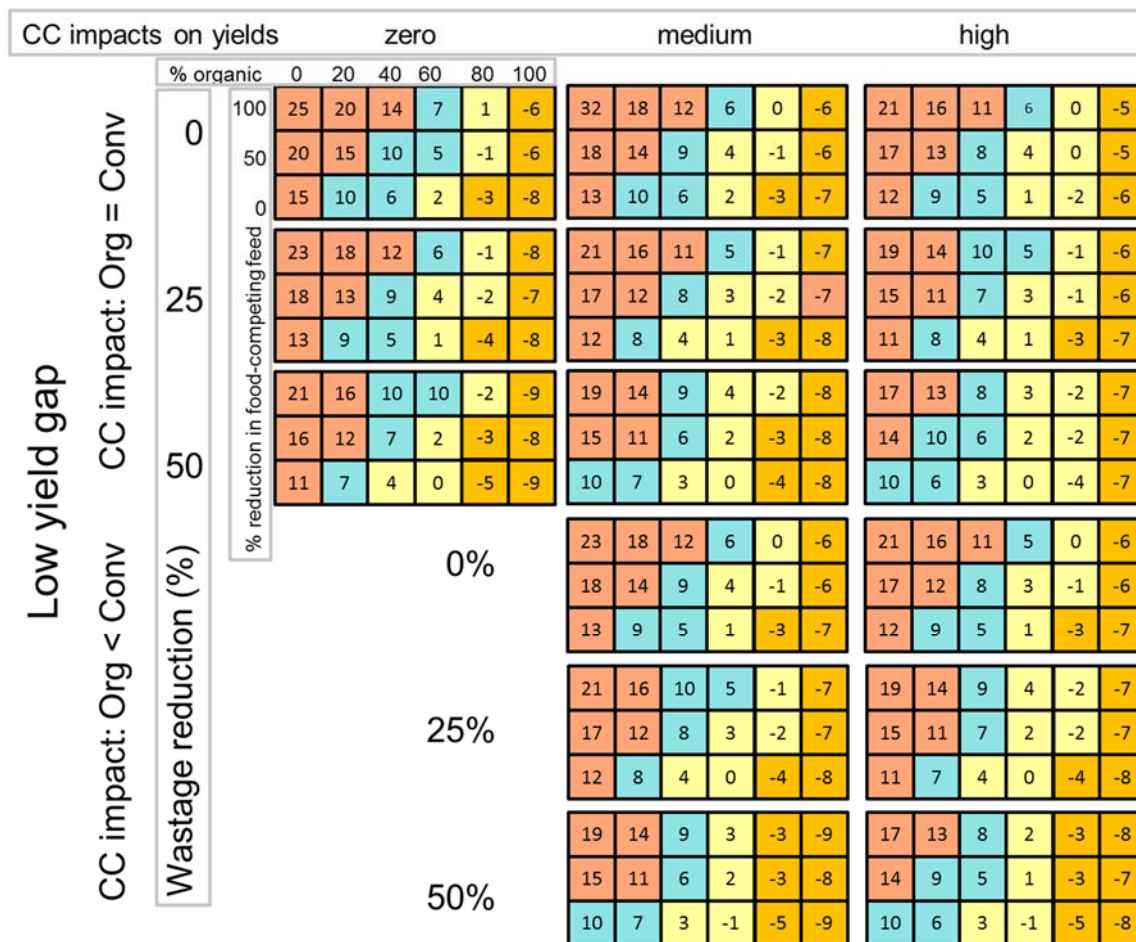

**Supplementary Figure 4: Nitrogen balance with low yield gaps assumed**

*N*-surplus (positive values) or deficit (negative values) in kg N/ha. Calories are kept constant for all scenarios. Low yield gaps<sup>9</sup>; scenarios differ in organic shares (0-100%); climate change impacts (low, medium, high; lower impacts for organic than conventional agriculture); food-competing feed reductions (0, 50, 100% reduced from the levels in the reference scenario) and wastage reduction (0, 25, 50% with respect to the reference scenario). Colour code for the relation to reference scenario values (0% organic agriculture, no changes in livestock feed and food waste): >10kg/ha: red (unsustainably high), between 10kg/ha and 5kg/ha blue (optimum, reduction from current average surplus by 60-80%<sup>31,32</sup>), between 4kg/ha and -2kg/ha yellow (critical, rather low), <-2kg/ha red (deficit).



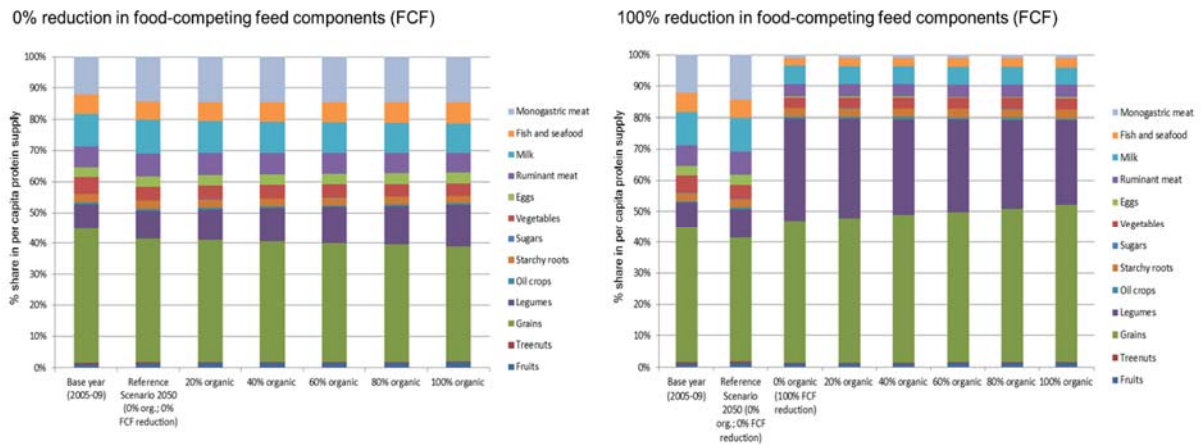

**Supplementary Figure 5: Dietary composition under high yield gaps and without impact of climate change on yields**

Dietary composition as shares of various commodity groups in per capita protein supply (before subtracting wastage) without (left) and with (right) reduction of food-competing feed; no climate change impacts; high yield gaps<sup>10</sup>. All scenarios provide the same amount of calories (no wastage reduction).

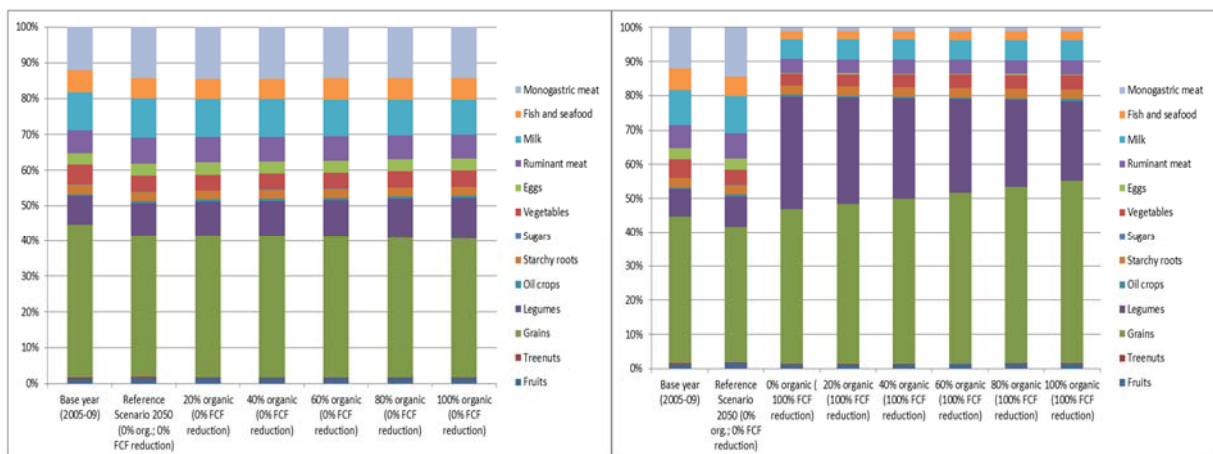

**Supplementary Figure 6: Dietary composition under low yield gaps and without impact of climate change on yields**

Dietary composition as shares of various commodity groups in per capita protein supply (before subtracting wastage) without (left) and with (right) reduction of food-competing feed; no climate change impacts; low yield gaps<sup>9</sup>. All scenarios provide the same amount of calories (no wastage reduction).

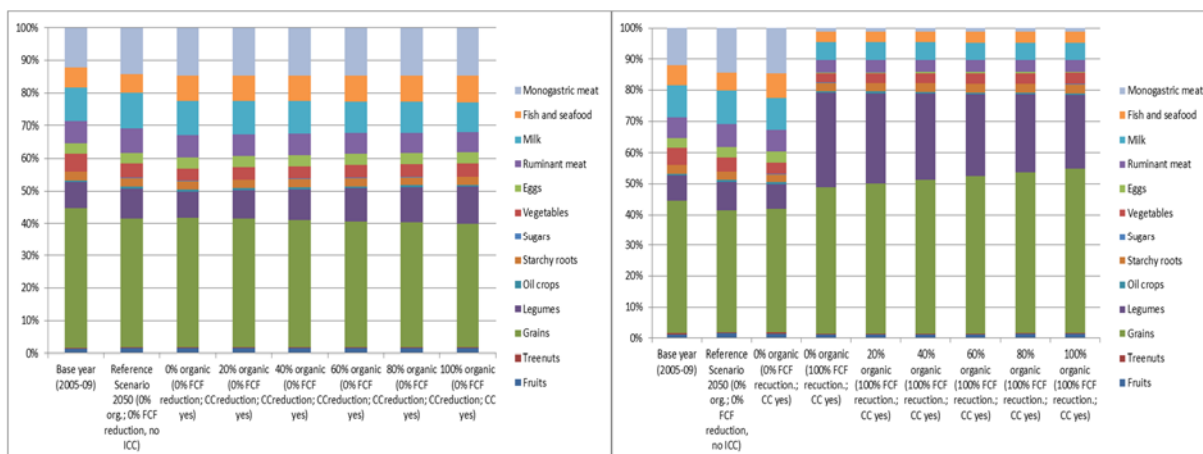

**Supplementary Figure 7: Dietary composition under high yield gaps and with impact of climate change on yields**

Dietary composition as shares of various commodity groups in per capita protein supply (before subtracting wastage) without (left) and with (right) reduction of food-competing feed; high climate change impacts; high yield gaps<sup>10</sup>. All scenarios provide the same amount of calories (no wastage reduction).

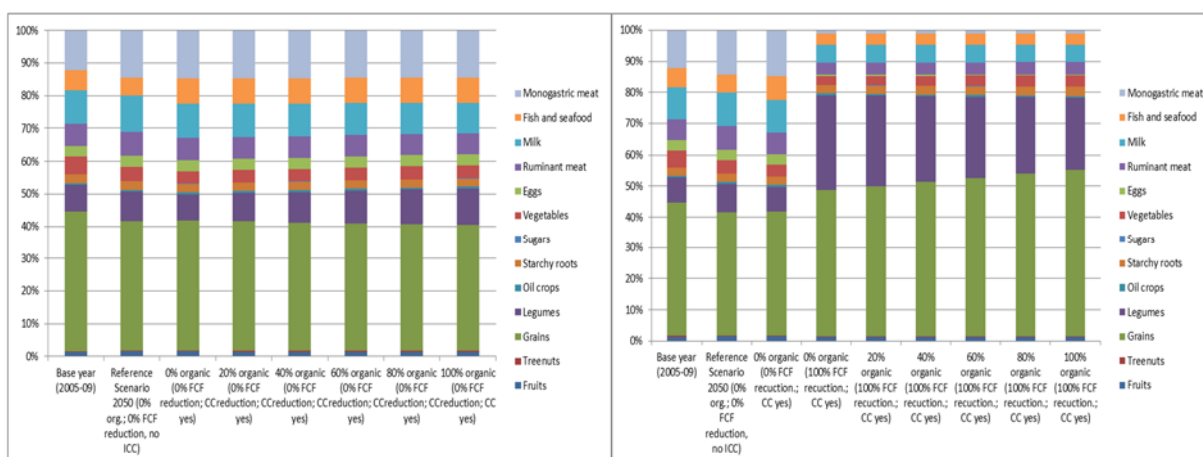

**Supplementary Figure 8: Dietary composition under low yield gaps and with impact of climate change on yields**

Dietary composition as shares of various commodity groups in per capita protein supply (before subtracting wastage) without (left) and with (right) reduction of food-competing feed; high climate change impacts; low yield gaps<sup>9</sup>. All scenarios provide the same amount of calories (no wastage reduction).

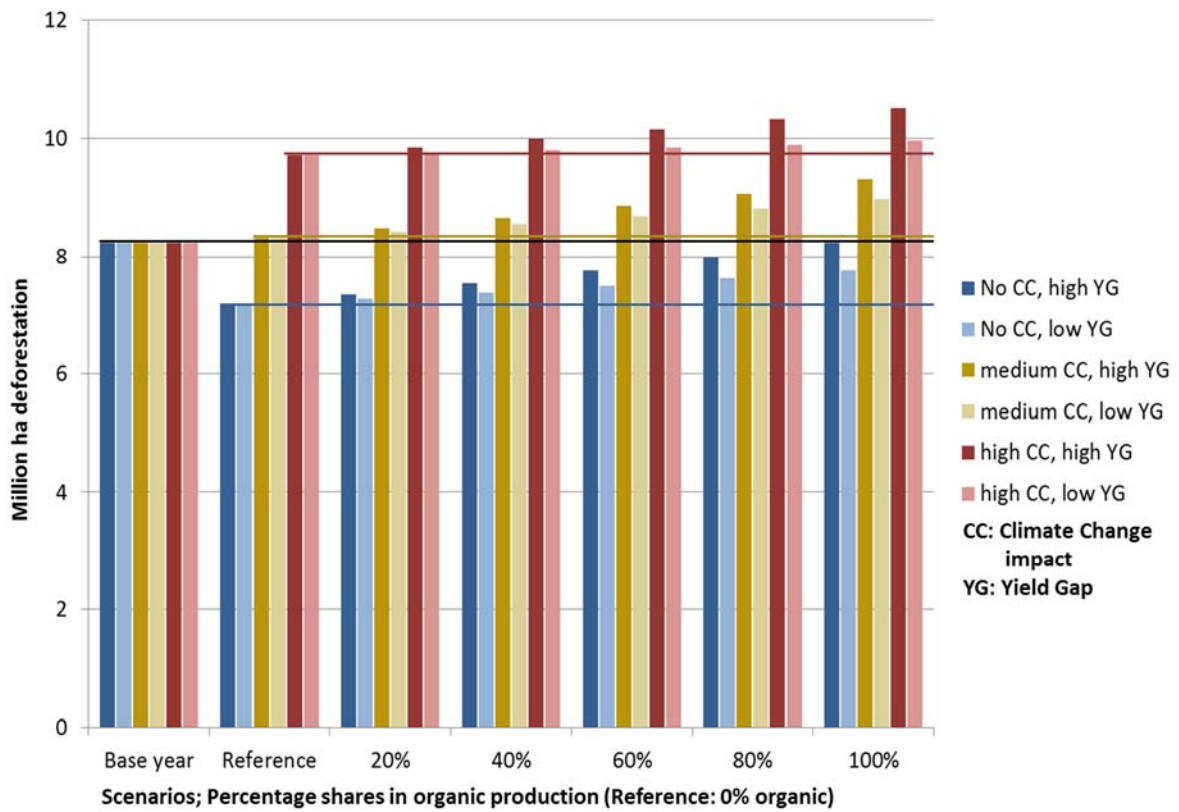

**Supplementary Figure 9: Deforestation**

Deforestation (million ha) for the base year, the reference scenarios (0% organic) and scenarios with increasing percentages of organic production. Displays scenarios with low and high yield gaps<sup>9,10</sup> without and with medium and full impacts of climate change on yields (no / medium / high CC).

0% food wastage reduction  
 0% reduction  
 in food-competing feed (FCF)

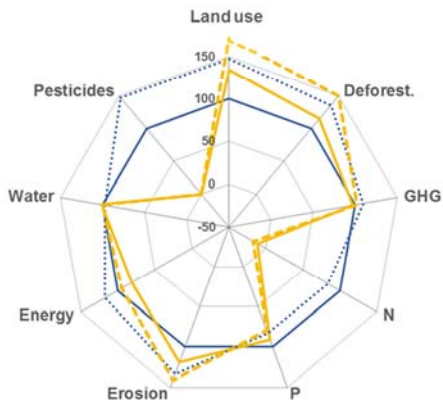

50% reduction in FCF

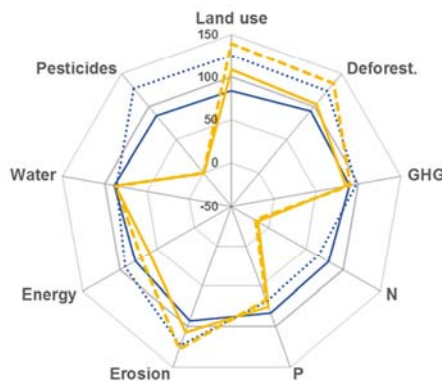

100% reduction in FCF

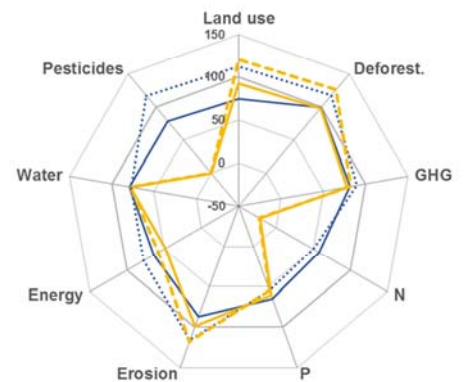

The numbers on the axis indicate % impact, rel. to the reference scenario (which is represented by the thicker grey line at 100%)

25% food wastage reduction  
 0% reduction  
 in food-competing feed (FCF)

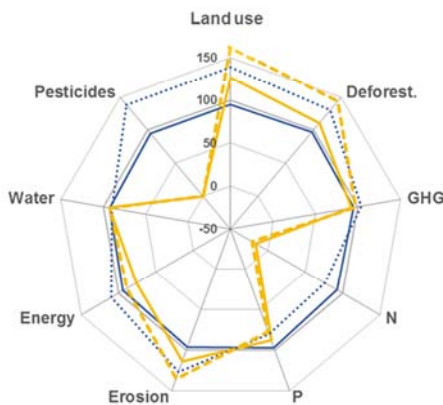

50% reduction in FCF

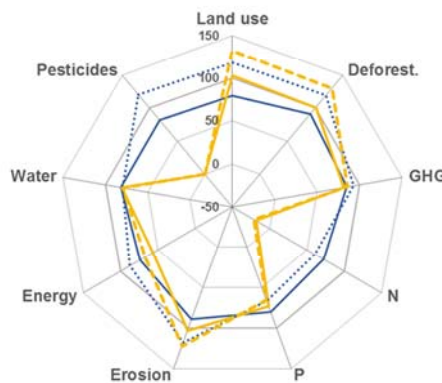

100% reduction in FCF

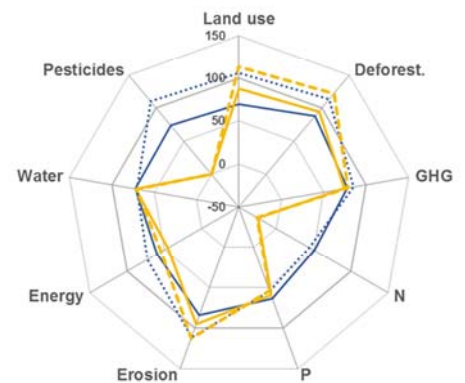

The numbers on the axis indicate % impact, rel. to the reference scenario (which is represented by the thicker grey line at 100%)

50% food wastage reduction  
 0% reduction  
 in food-competing feed (FCF)

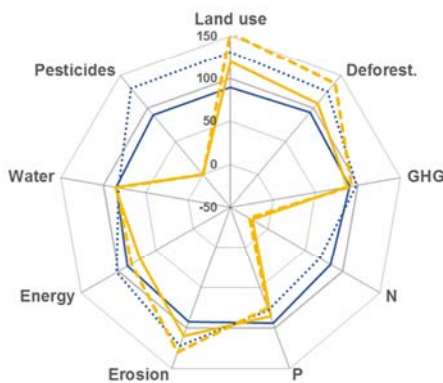

50% reduction in FCF

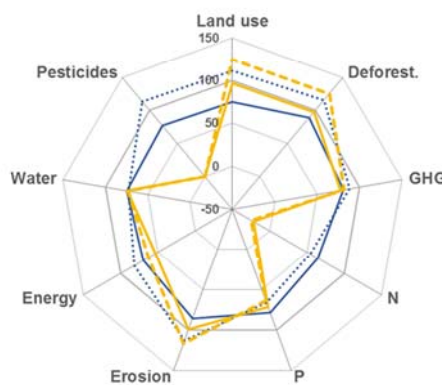

100% reduction in FCF

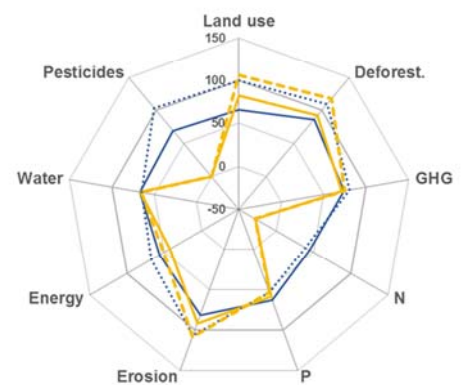

The numbers on the axis indicate % impact, rel. to the reference scenario (which is represented by the thicker grey line at 100%)

**Supplementary Figure 10: Year 2050 relative environmental impacts of a full conversion to organic agriculture in combination with complementary food systems strategies under high yield gaps**

*Percentage of environmental impacts with respect to the reference scenario (i.e. 0% organic agriculture, no changes in livestock feed and food waste; dark grey line); Calories are kept constant for all scenarios without food wastage reduction; high yield gaps<sup>10</sup> assumed; the lines show the range of impacts for 0% (dark blue) to 100% organic shares (yellow) under the respective reduction of food-competing feed and wastage as indicated for each panel; the solid lines indicate environmental impacts without impacts of climate change on yields, the dotted lines indicate environmental impacts with ICC. The thicker solid grey gridline indicates the 100% level, i.e. the reference scenario. Food-competing feed (FCF) use is at the levels of the reference scenario on the left (i.e. 0% reduction in FCF) and changes towards zero FCF use to the right (i.e. 100% reduction in FCF); wastage reduction changes from 0% (top panel) to 50% (bottom). Indicators displayed: cropland use, deforestation, GHG emissions (incl. deforestation, organic soils), N- and P-surplus, water use, non-renewable energy use, soil erosion, pesticide use.*



0% food wastage reduction  
 0% reduction  
 in food-competing feed (FCF)

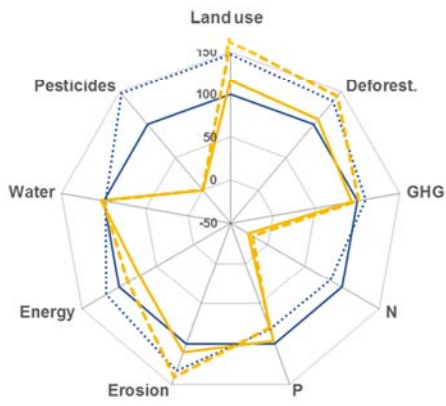

The numbers on the axis indicate % impact, rel. to the reference scenario (which is represented by the thicker grey line at 100%)

50% reduction in FCF

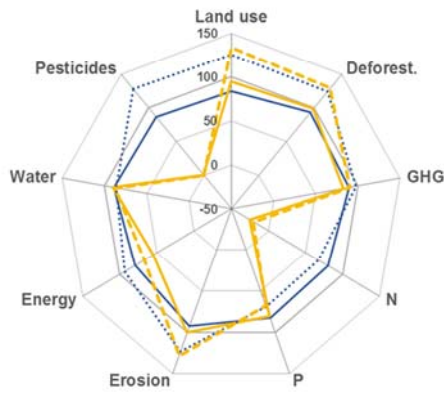

100% reduction in FCF

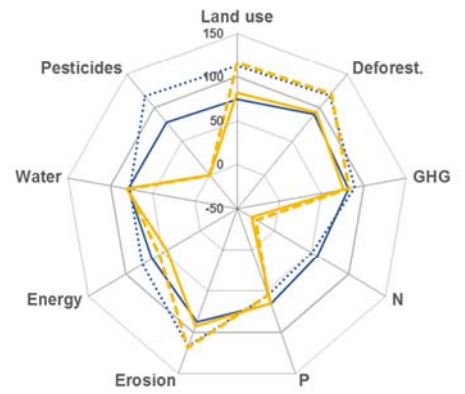

25% food wastage reduction  
 0% reduction  
 in food-competing feed (FCF)

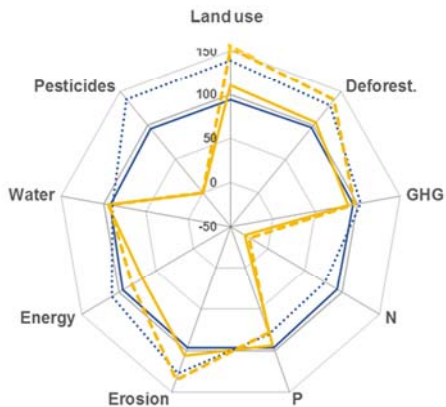

The numbers on the axis indicate % impact, rel. to the reference scenario (which is represented by the thicker grey line at 100%)

50% reduction in FCF

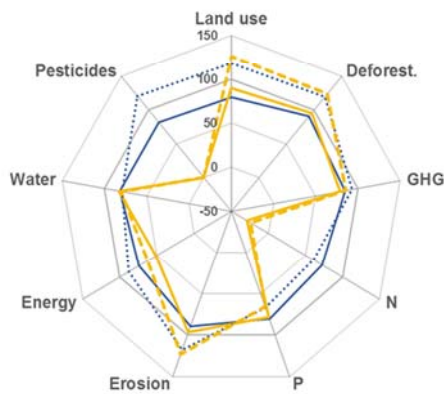

100% reduction in FCF

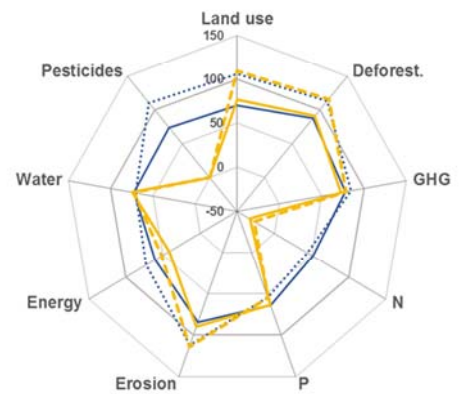

50% food wastage reduction  
 0% reduction  
 in food-competing feed (FCF)

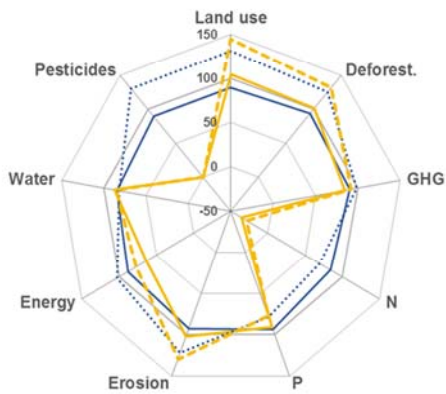

The numbers on the axis indicate % impact, rel. to the reference scenario (which is represented by the thicker grey line at 100%)

50% reduction in FCF

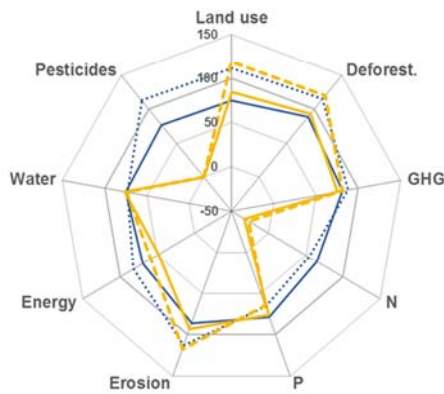

100% reduction in FCF

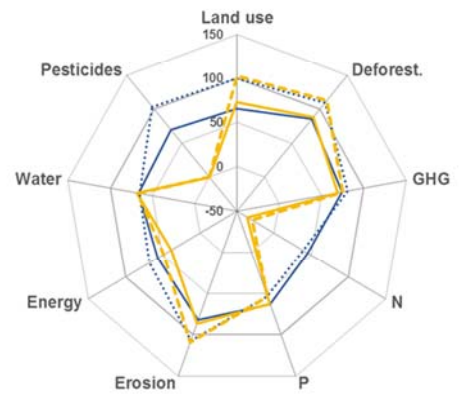

**Supplementary Figure 11: Year 2050 relative environmental impacts of a full conversion to organic agriculture in combination with complementary food systems strategies under low yield gaps**

*Percentage of environmental impacts with respect to the reference scenario (i.e. 0% organic agriculture, no changes in livestock feed and food waste; dark grey line); Calories are kept constant for all scenarios without food wastage reduction; low yield gaps<sup>9</sup> assumed; the lines show the range of impacts for 0% (dark blue) to 100% organic shares (yellow) under the respective reduction of food-competing feed and wastage as indicated for each panel; the solid lines indicate environmental impacts without impacts of climate change on yields, the dotted lines indicate environmental impacts with impacts of CC. The thicker solid grey gridline indicates the 100% level, i.e. the reference scenario. Food-competing feed (FCF) use is at the levels of the reference scenario on the left (i.e. 0% reduction in FCF) and changes towards zero FCF use to the right (i.e. 100% reduction in FCF); wastage reduction is displayed in the three panels, from 0% (top) to 50% (bottom). The indicators are cropland use, deforestation, GHG emissions (incl. deforestation and organic soils), N- and P-surplus, water use, non-renewable energy use, soil erosion and pesticide use.*

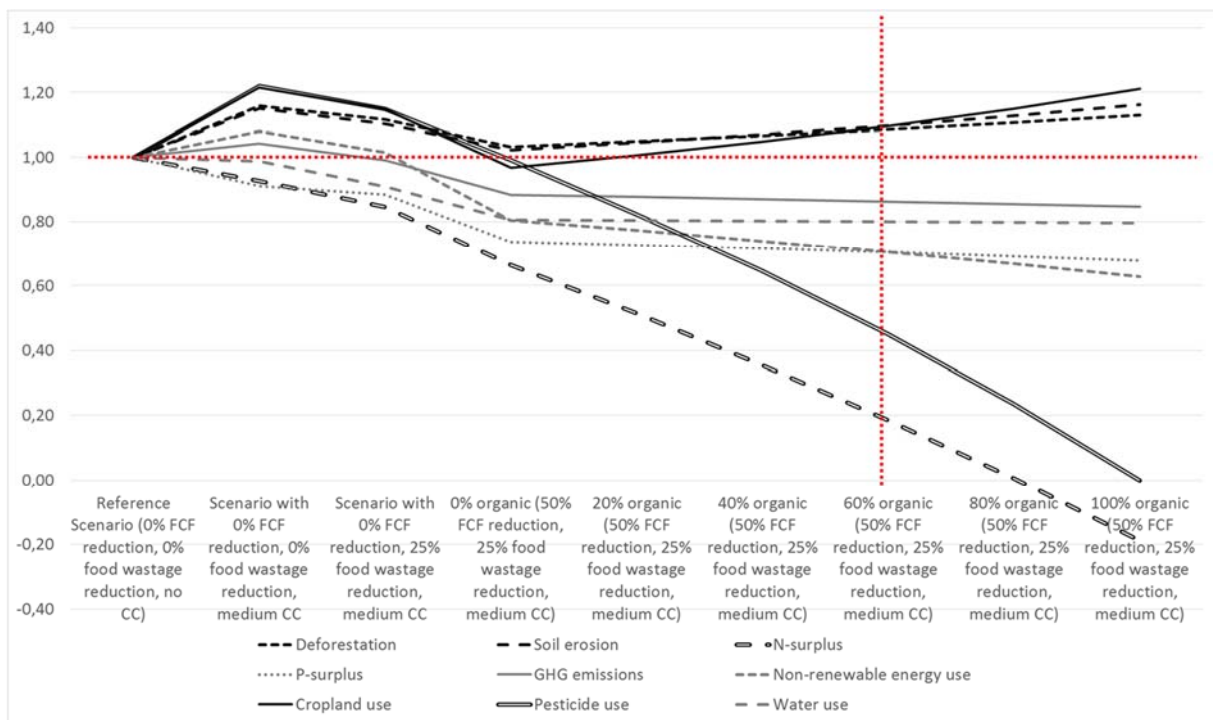

Supplementary Figure 12: Relative change of environmental impacts with respect to the reference scenario for increasing shares of organic production. The dotted red horizontal line indicates the level for the reference scenario, the dotted red vertical line indicates the values for 60% conversion to organic agriculture. Calories are kept constant for all scenarios without food waste reduction; high yield gaps, 50% food-competing feed (FCF) reduction, 25% food waste reduction and intermediate impact of CC assumed; to the left, for comparison, the scenarios without food-competing feed and food waste reduction but CC impact, as well as no food-competing feed reduction, 25% food waste reduction and CC impact are displayed.



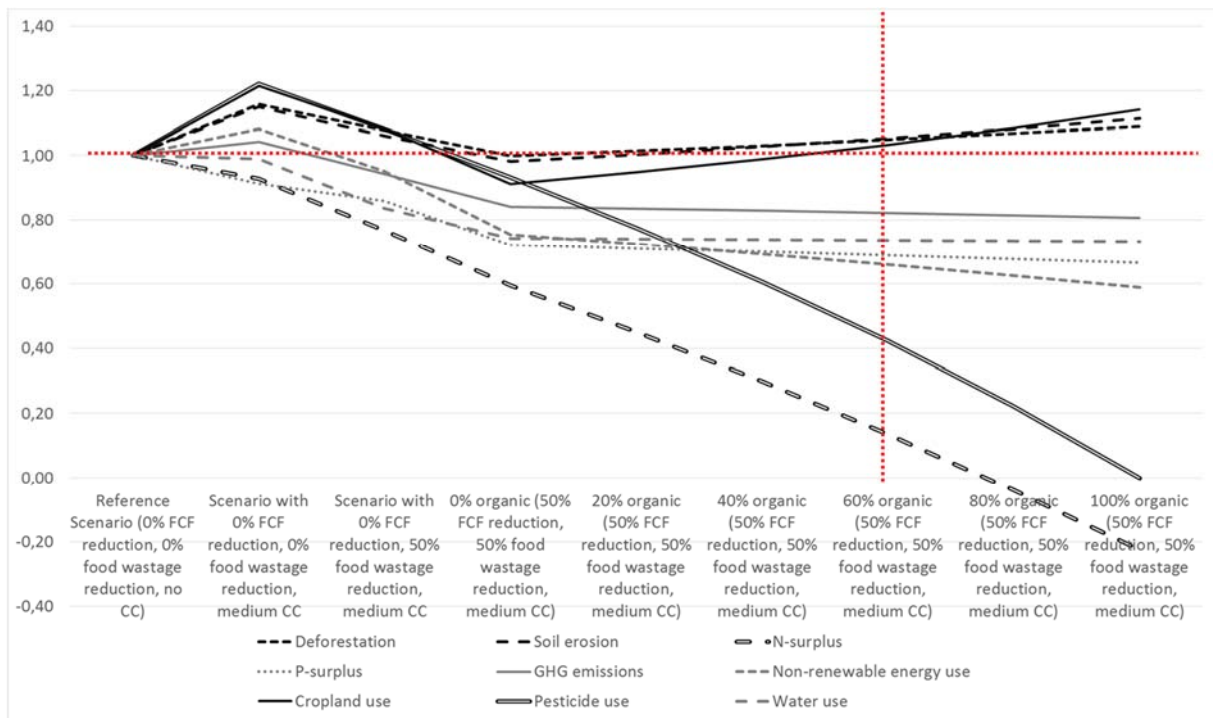

*Supplementary Figure 13: Relative change of environmental impacts with respect to the reference scenario for increasing shares of organic production. The dotted red horizontal line indicates the level for the reference scenario, the dotted red vertical line indicates the values for 60% conversion to organic agriculture. Calories are kept constant for all scenarios without food wastage reduction; high yield gaps, 50% food-competing feed (FCF) reduction, 50% food wastage reduction and intermediate impact of CC assumed; to the left, for comparison, the scenarios without food-competing feed and food wastage reduction but CC impact, as well as no food-competing feed reduction, 50% food wastage reduction and CC impact are displayed.*

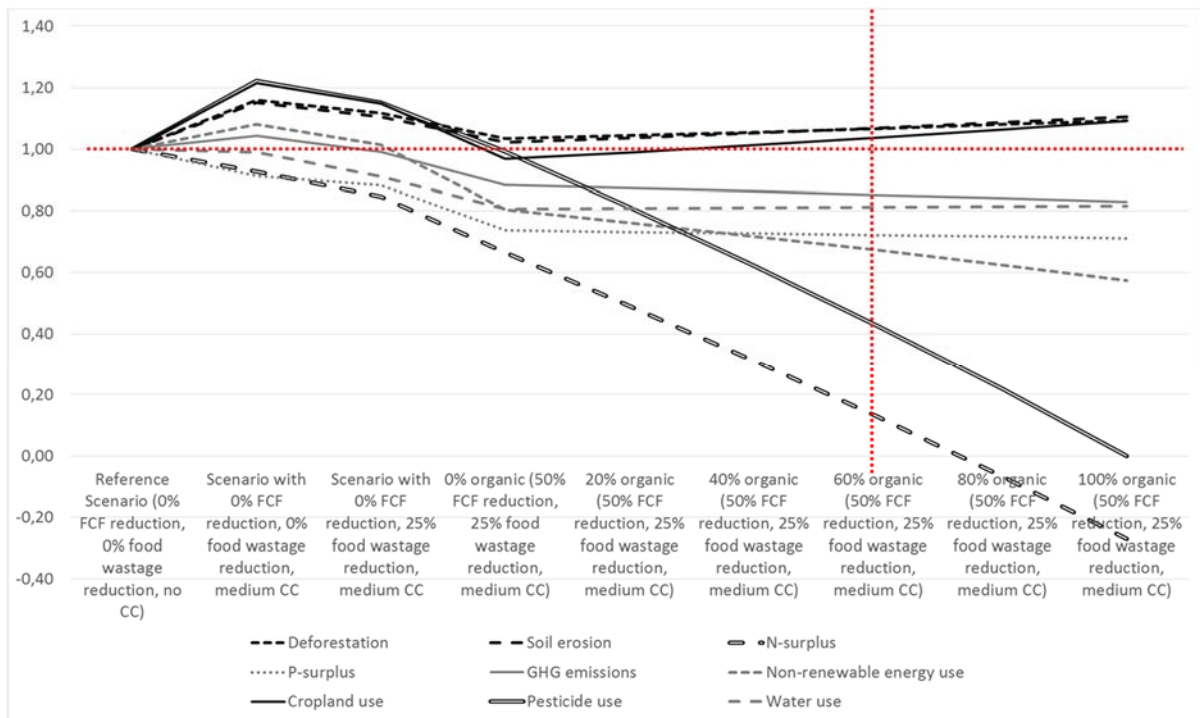

Supplementary Figure 14: Relative change of environmental impacts with respect to the reference scenario for increasing shares of organic production. The dotted red horizontal line indicates the level for the reference scenario, the dotted red vertical line indicates the values for 60% conversion to organic agriculture. Calories are kept constant for all scenarios without food wastage reduction; low yield gaps, 50% food-competing feed (FCF) reduction, 25% food wastage reduction and intermediate impact of CC assumed; to the left, for comparison, the scenarios without food-competing feed and food wastage reduction but CC impact, as well as no food-competing feed reduction, 25% food wastage reduction and CC impact are displayed.

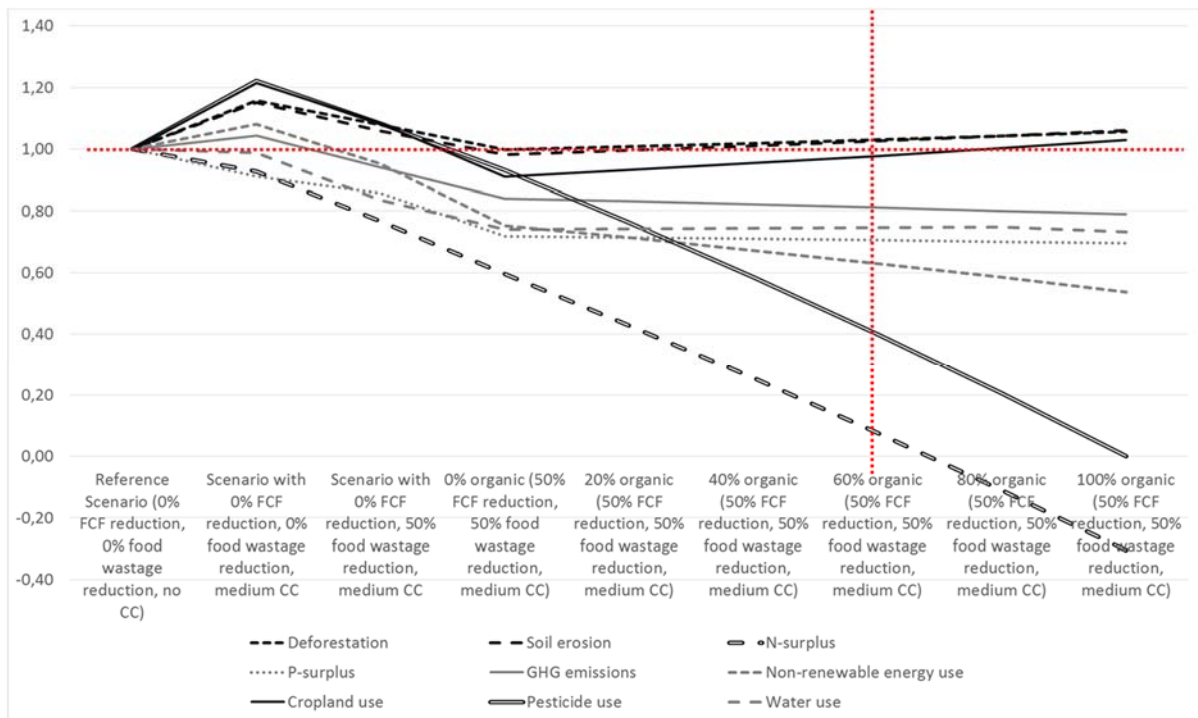

*Supplementary Figure 15: Relative change of environmental impacts with respect to the reference scenario for increasing shares of organic production. The dotted red horizontal line indicates the level for the reference scenario, the dotted red vertical line indicates the values for 60% conversion to organic agriculture. Calories are kept constant for all scenarios without food wastage reduction; low yield gaps, 50% food-competing feed (FCF) reduction, 50% food wastage reduction and intermediate impact of CC assumed; to the left, for comparison, the scenarios without food-competing feed and food wastage reduction but CC impact, as well as no food-competing feed reduction, 50% food wastage reduction and CC impact are displayed.*
